# Supplementary material
Source: publisher figshare collection journal article supplement (https://acs.figshare.com/ndownloader/files/4082104)
Supplement: Supplementary file 1 [file 4082104]

# Supporting Information:

## Effect of the Al Siting on the Structure of Co(II) and Cu(II) Cationic Sites in Ferrierite. A Periodic DFT Molecular Dynamics and FTIR study

Stepan Sklenak,<sup>†,\*</sup> Prokopis C. Andrikopoulos,<sup>†</sup> Sarah R. Whittleton,<sup>†</sup> Hana Jirglova,<sup>†</sup> Petr Sazama,<sup>†</sup> Lubomir Benco,<sup>‡,⊥</sup> Tomas Bucko,<sup>‡,§,⊥</sup> Juergen Hafner,<sup>‡</sup> and Zdenek Sobalik,<sup>†</sup>

*J. Heyrovský Institute of Physical Chemistry of the Academy of Sciences of the Czech Republic, Dolejškova 3, 182 23 Prague 8, Czech Republic, Institut für Materialphysik and Center for Computational Materials Science, Universität Wien, Sensengasse 8, A-1090 Vienna, Austria, Department of Physical and Theoretical Chemistry, Faculty of Natural Sciences, Comenius University, Mlynska Dolina, SK-84215 Bratislava, Slovakia, and Institute of Inorganic Chemistry, Slovak Academy of Sciences, Dubravska cesta 9, SK-84236 Bratislava, Slovakia*

\*Corresponding author. E-mail: stepan.sklenak@jh-inst.cas.cz.

<sup>†</sup> J. Heyrovsky Institute of Physical Chemistry, Academy of Sciences of the Czech Republic.

<sup>‡</sup> Institut für Materialphysik and Center for Computational Materials Science, Universität Wien.

<sup>§</sup> Department of Physical and Theoretical Chemistry, Faculty of Natural Sciences, Comenius University.

<sup>⊥</sup> Institute of Inorganic Chemistry, Slovak Academy of Sciences.

## Figure Captions

**Figure S1.** Optimized structures of the  $\beta - 1$  site of Co-ferrierite before (left) and after (right) molecular dynamics simulations. The distances are in Å. Silicon atoms are in gray, oxygen atoms in red, aluminum atoms in yellow, and cobalt atom in violet.

**Figure S2.** Optimized structures of the  $\beta - 1$  site of Cu-ferrierite before (left) and after (right) molecular dynamics simulations. The distances are in Å. Silicon atoms are in gray, oxygen atoms in red, aluminum atoms in yellow, and copper atom in pink.

**Figure S3.** Optimized structures of the  $\alpha$  site of Co-ferrierite before (left) and after (right) molecular dynamics simulations. The distances are in Å. Silicon atoms are in gray, oxygen atoms in red, aluminum atoms in yellow, and cobalt atom in violet.

**Figure S4.** Optimized structures of the  $\alpha$  site of Cu-ferrierite before (left) and after (right) molecular dynamics simulations. The distances are in Å. Silicon atoms are in gray, oxygen atoms in red, aluminum atoms in yellow, and copper atom in pink.

**Figure S5.** Optimized structures of the  $\beta - 2$  site of Co-ferrierite before (left) and after (right) molecular dynamics simulations. The distances are in Å. Silicon atoms are in gray, oxygen atoms in red, aluminum atoms in yellow, and cobalt atom in violet.

**Figure S6.** Optimized structures of the  $\beta - 2$  site of Cu-ferrierite before (left) and after (right) molecular dynamics simulations. The distances are in Å. Silicon atoms are in gray, oxygen atoms in red, aluminum atoms in yellow, and copper atom in pink.

**Figure S7.** Optimized structures of the  $\beta - 1$  site of NO-Co-ferrierite before (left) and after (right) molecular dynamics simulations. The distances are in Å and the bond angle in degrees. Silicon atoms are in gray, oxygen atoms in red, aluminum atoms in yellow, nitrogen atom in blue, and cobalt atom in violet.

**Figure S8.** Optimized structures of the  $\beta - 1$  site of NO–Cu–ferrierite before (left) and after (right) molecular dynamics simulations. The distances are in Å and the bond angle in degrees. Silicon atoms are in gray, oxygen atoms in red, aluminum atoms in yellow, nitrogen atom in blue, and copper atom in pink.

**Figure S9.** Optimized structures of the  $\alpha$  site of NO–Co–ferrierite before (left) and after (right) molecular dynamics simulations. The distances are in Å and the bond angle in degrees. Silicon atoms are in gray, oxygen atoms in red, aluminum atoms in yellow, nitrogen atom in blue, and cobalt atom in violet.

**Figure S10.** Optimized structures of the  $\alpha$  site of NO–Cu–ferrierite before (left) and after (right) molecular dynamics simulations. The distances are in Å and the bond angle in degrees. Silicon atoms are in gray, oxygen atoms in red, aluminum atoms in yellow, nitrogen atom in blue, and copper atom in pink.

**Figure S11.** Optimized structures of the  $\beta - 2$  site of NO–Co–ferrierite before (left) and after (right) molecular dynamics simulations. The distances are in Å and the bond angle in degrees. Silicon atoms are in gray, oxygen atoms in red, aluminum atoms in yellow, nitrogen atom in blue, and cobalt atom in violet.

**Figure S12.** Optimized structures of the  $\beta - 2$  site of NO–Cu–ferrierite before (left) and after (right) molecular dynamics simulations. The distances are in Å and the bond angle in degrees. Silicon atoms are in gray, oxygen atoms in red, aluminum atoms in yellow, nitrogen atom in blue, and copper atom in pink.

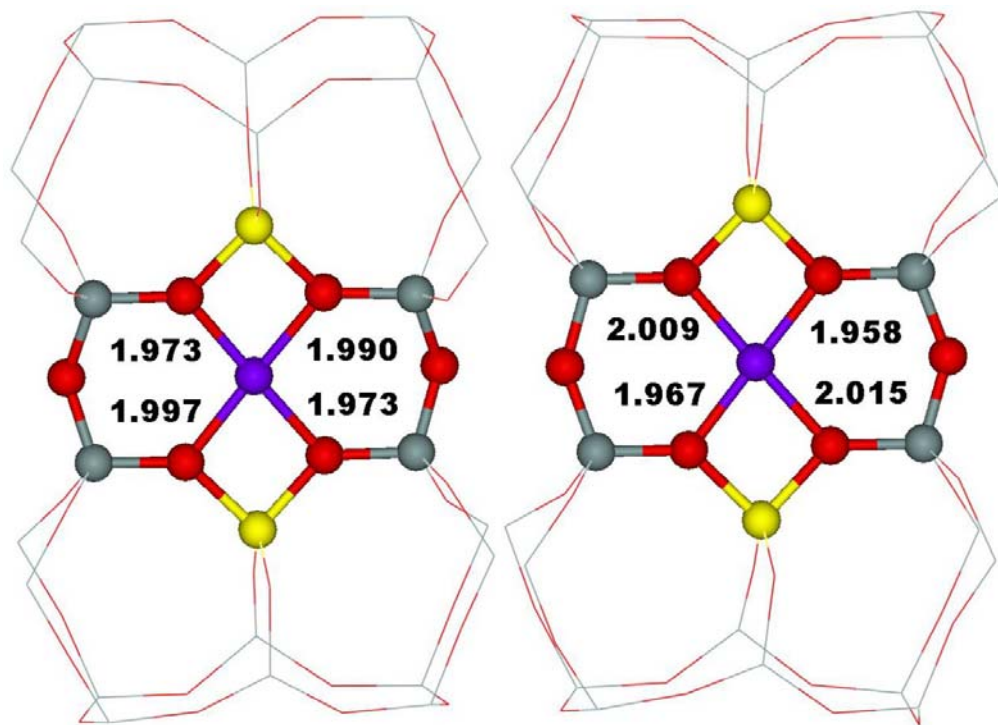

Figure S1

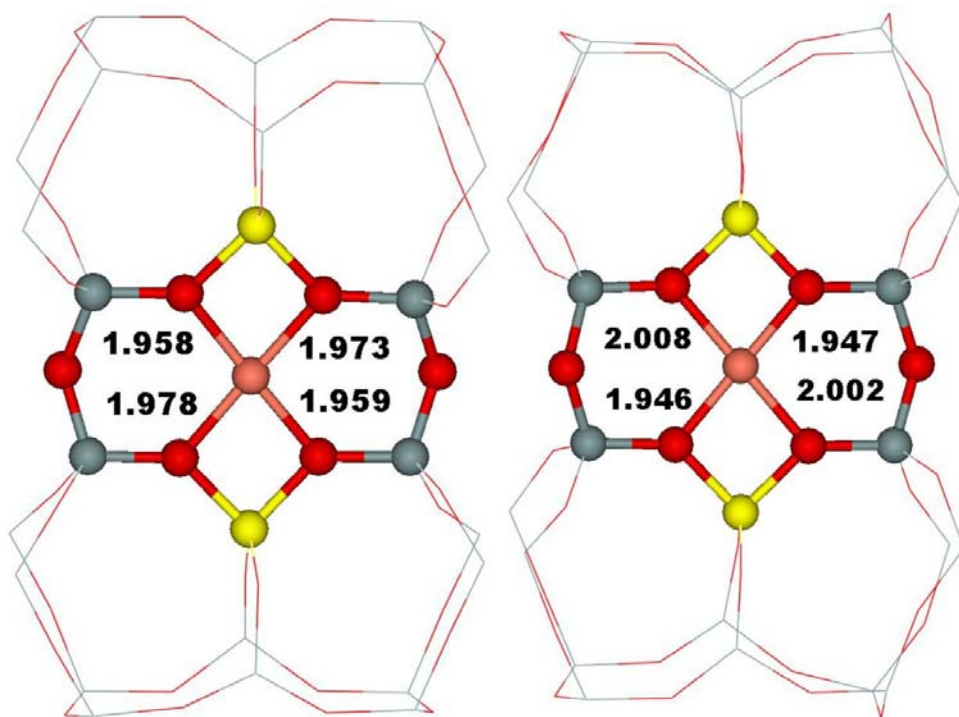

Figure S2

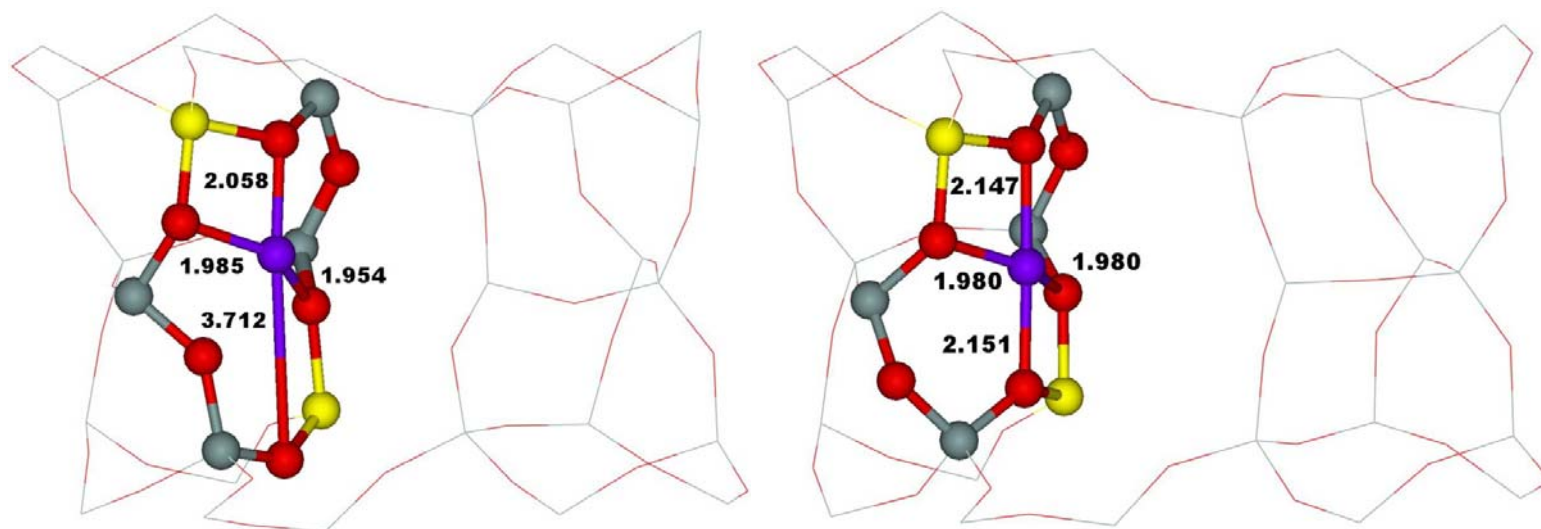

Figure S3

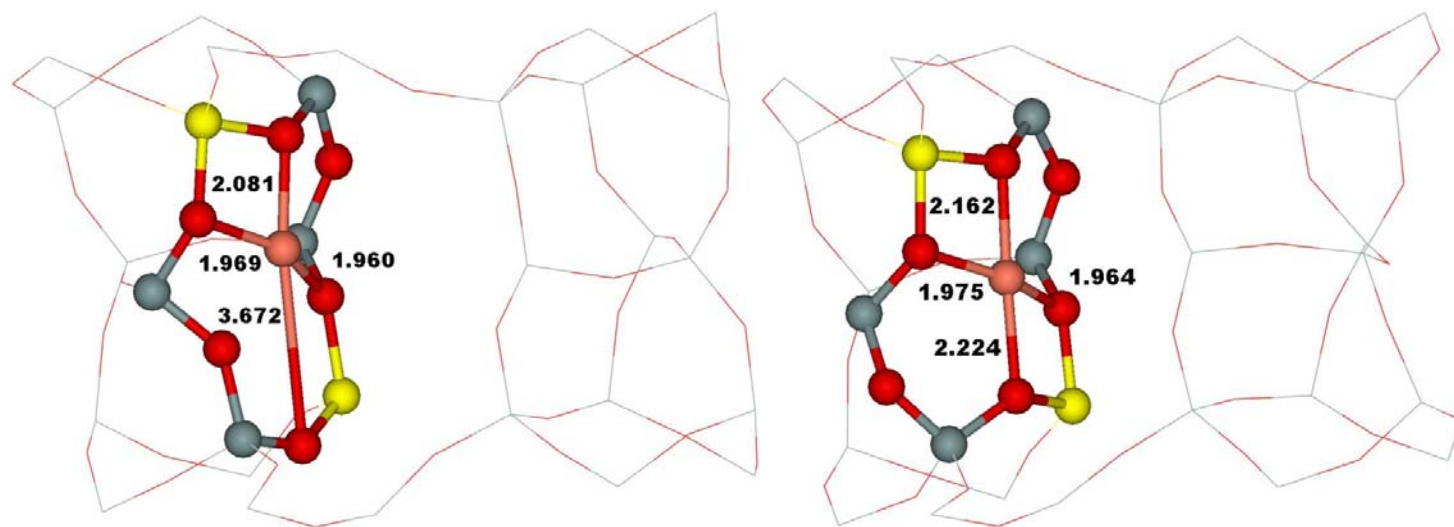

Figure S4

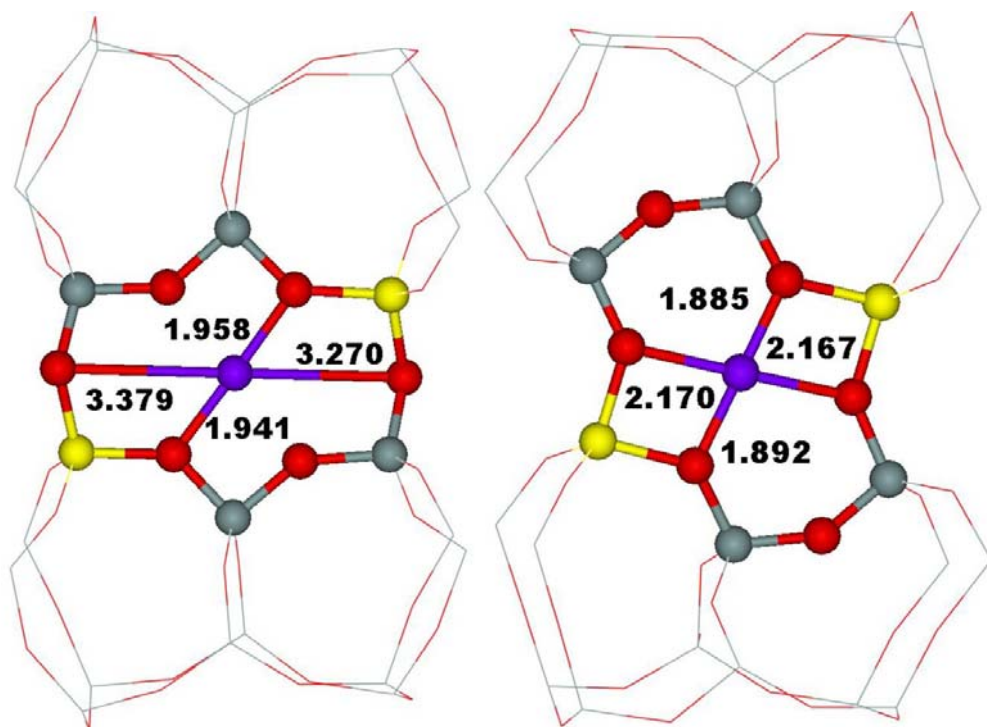

Figure S5



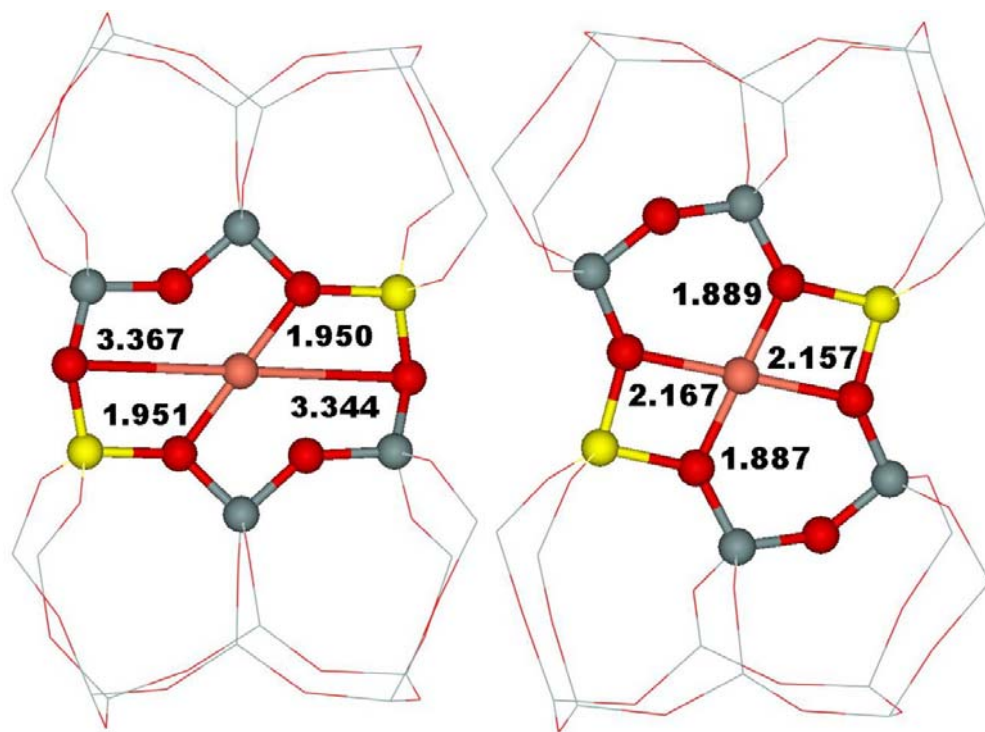

Figure S6

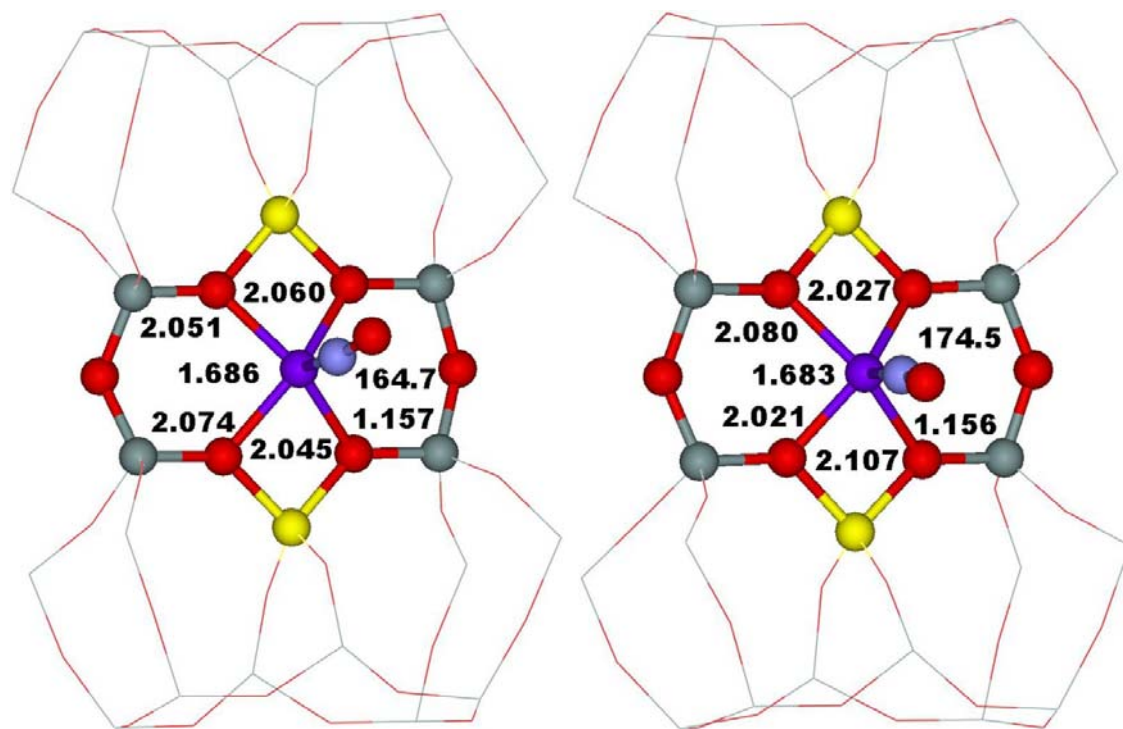

Figure S7

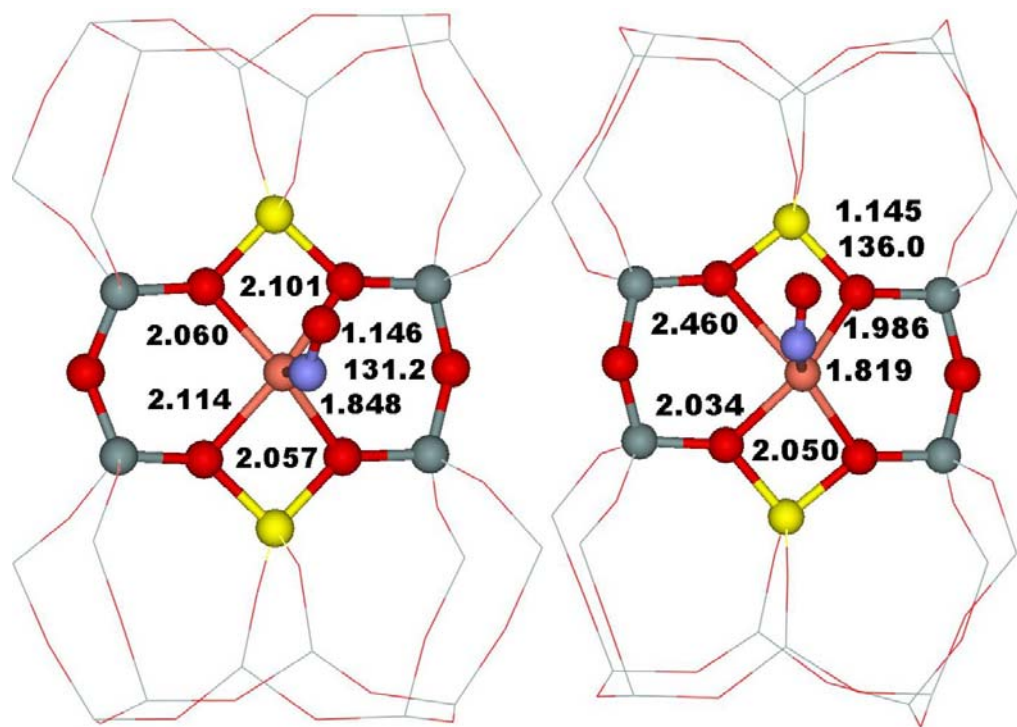

Figure S8

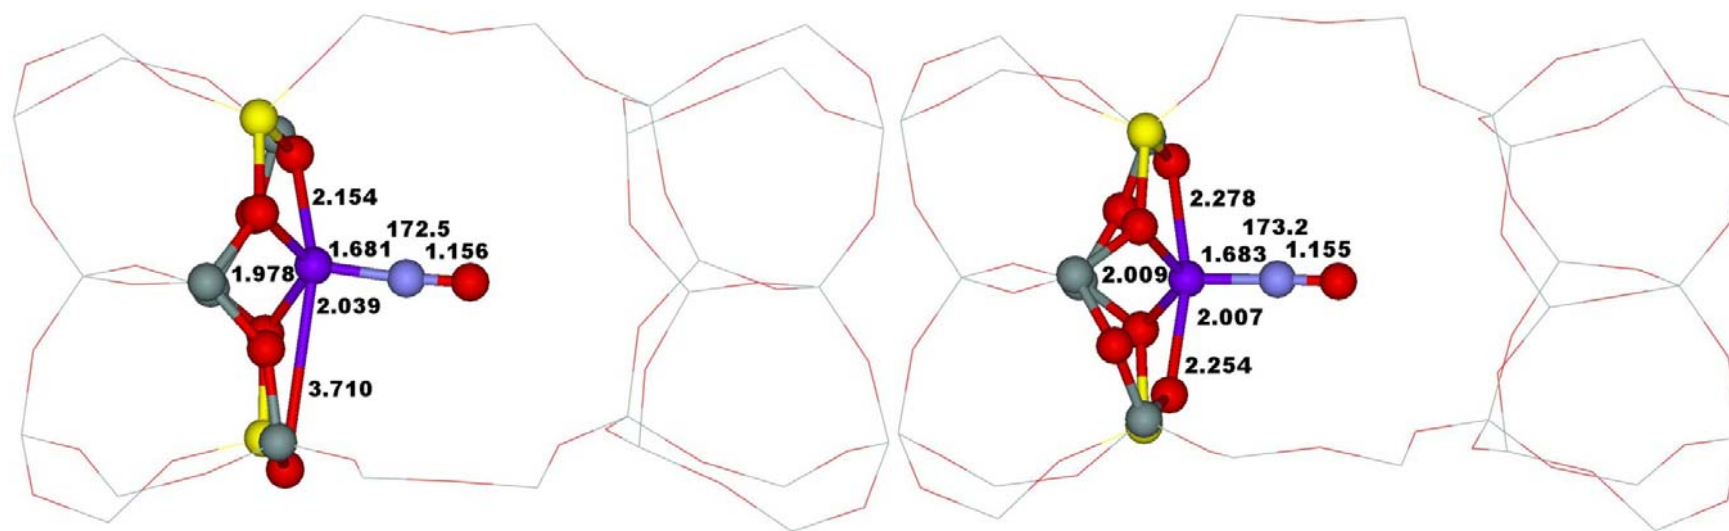

Figure S9

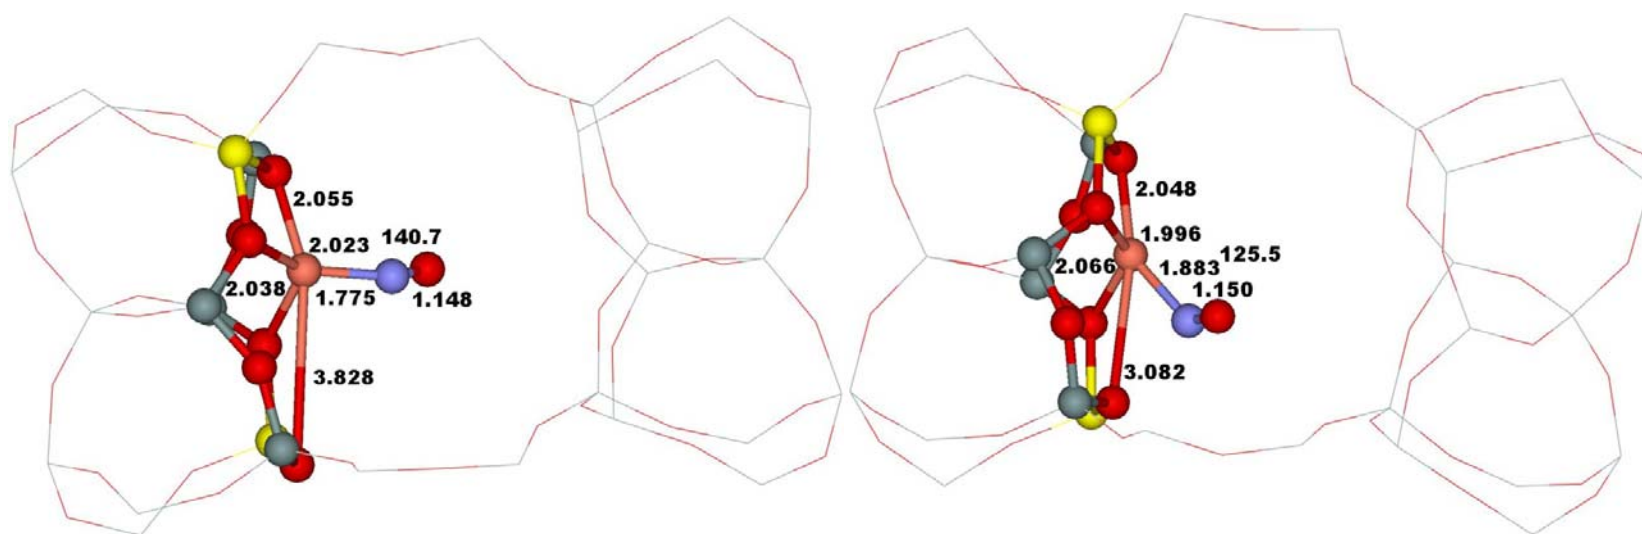

Figure S10

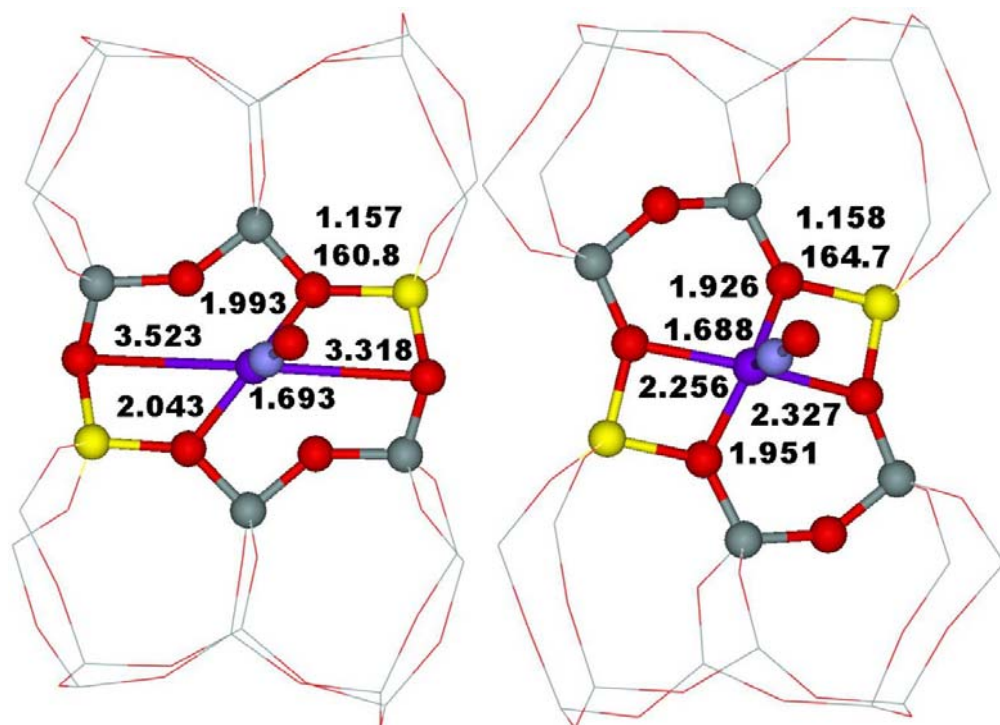

Figure S11

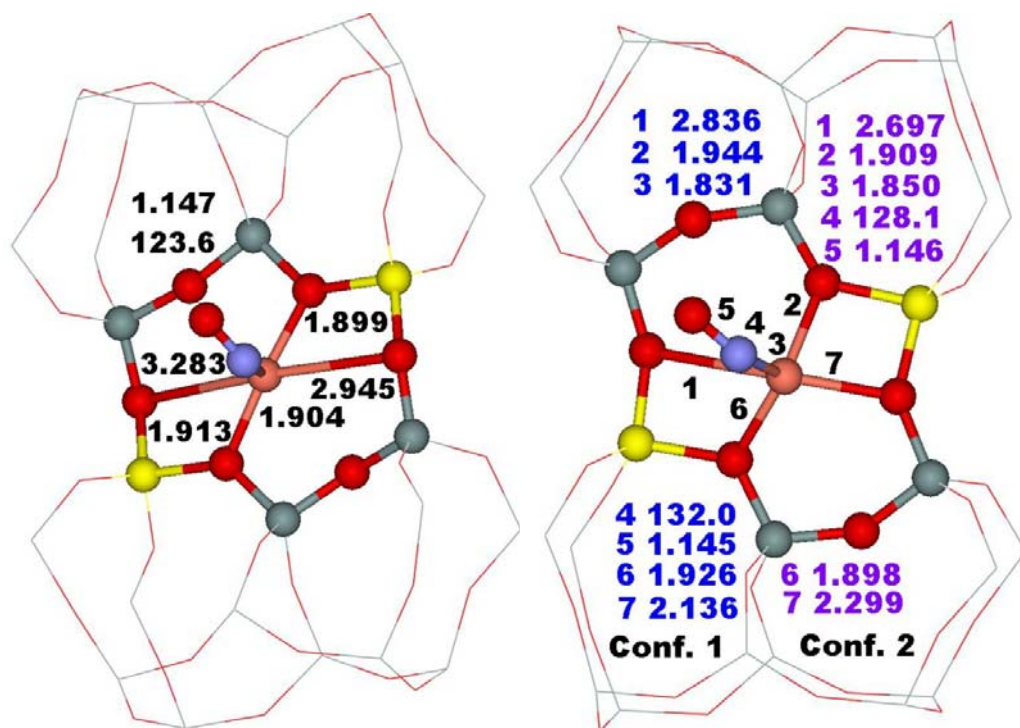

Figure S12
